# Supplementary material for: Assessment of Bidirectional Relationships between Mental Illness and Rheumatoid Arthritis: A Two-Sample Mendelian Randomization Study
Source: MDPI journal article supplement (doi:10.3390/jcm12030944), 2023-01-25
Supplement: s1 [file s1]

## *Supplementary Material*

### **1 Supplementary Tables**

**Table S1.** Horizontal pleiotropy analysis between exposure factors and outcome variables.

| <b>Exposure</b>      | <b>Outcome</b>       | <b>Method</b>        | <b>P-value</b> |
|----------------------|----------------------|----------------------|----------------|
| Bipolar disorder     | Rheumatoid arthritis | Cochrane Q statistic | 0.01           |
|                      |                      | MR-Egger regression  | 0.64           |
| Broad depression     |                      |                      | <b>NA</b>      |
| Major depression     |                      | Cochrane Q statistic | 0.01           |
|                      |                      | MR-Egger regression  | 0.29           |
| Anxiety              |                      | Cochrane Q statistic | 0.19           |
|                      |                      | MR-Egger regression  | 0.67           |
| Rheumatoid arthritis | Bipolar disorder     | Cochrane Q statistic | <0.001         |
|                      |                      | MR-Egger regression  | 0.52           |
|                      | Broad depression     | Cochrane Q statistic | 0.002          |
|                      |                      | MR-Egger regression  | 0.83           |
|                      | Major depression     | Cochrane Q statistic | <0.001         |
|                      |                      | MR-Egger regression  | 0.90           |
|                      | Anxiety              | Cochrane Q statistic | 0.22           |
|                      |                      | MR-Egger regression  | 0.91           |
|                      |                      |                      |                |
|                      |                      |                      |                |

**Table S2.** F statistic between genetic instruments and exposure.

| <b>Exposure</b>      | <b>Outcome</b>       | <b>F-statistic (median)</b> | <b>F-statistic<br/>(minimum)</b> | <b>F-statistic<br/>(maximum)</b> |
|----------------------|----------------------|-----------------------------|----------------------------------|----------------------------------|
| Bipolar disorder     | Rheumatoid arthritis | 160.76                      | 114.84                           | 288.34                           |
| Broad depression     |                      | 10.19                       | 10.01                            | 10.36                            |
| Major depression     |                      | 90.12                       | 11.37                            | 249.38                           |
| Anxiety              |                      | 144.88                      | 104.86                           | 213.70                           |
| Rheumatoid arthritis | Bipolar disorder     | 322.46                      | 156.98                           | 11546.19                         |
|                      | Broad depression     | 319.10                      | 156.98                           | 11546.19                         |
|                      | Major depression     | 315.75                      | 156.98                           | 3732.81                          |
|                      | Anxiety              | 313.68                      | 156.89                           | 3730.51                          |

**Table S3.** Potential confounding variables in SNPs associated with bipolar disorder, broad depression, major depression, and anxiety.

| Exposure         | Outcome              | SNP        | Potential confounding trait | P-value  |
|------------------|----------------------|------------|-----------------------------|----------|
| Bipolar disorder | Rheumatoid arthritis | rs1487445  | Body mass index             | 3.95e-10 |
|                  |                      | rs2336147  | Body mass index             | 1.18e-09 |
|                  |                      | rs4790841  | Body mass index             | 7.49e-19 |
| Broad depression | Rheumatoid arthritis | NA         | NA                          | NA       |
| Major depression | Rheumatoid arthritis | rs34488670 | Current tobacco smoking     | 4.08e-08 |
|                  |                      | rs3823624  | Body mass index             | 2.53e-13 |
|                  |                      | rs7685686  | Alcohol intake frequency    | 2.29e-08 |
|                  |                      | rs7807677  | Ever smoked                 | 5.34e-11 |
|                  |                      | rs2568958  | Body mass index in smokers  | 1.09e-08 |
|                  |                      | rs301799   | Body mass index             | 6.10E-07 |
|                  |                      | rs1095626  | Body mass index             | 1.86E-08 |
|                  |                      | rs10061069 | Alcohol intake frequency    | 1.63E-08 |
|                  |                      | rs30266    | Body mass index             | 7.95E-06 |
|                  |                      | rs200949   | Ever smoked                 | 7.87E-07 |
|                  |                      | rs11135349 | Body mass index             | 2.37E-06 |
| Anxiety          | Rheumatoid arthritis | rs7528604  | Body mass index             | 2.40e-08 |

NA: There is no potential confounding variables in SNPs.

**Table S4.** Estimates of causal effect of bipolar disorder, major depression, and anxiety on rheumatoid arthritis after removal of SNPs associated with potential confounders.

| Exposure         | Outcome              | Method                    | No. of SNPs | OR (95% CI)       | P-value |
|------------------|----------------------|---------------------------|-------------|-------------------|---------|
| Bipolar disorder | Rheumatoid arthritis | Inverse variance weighted | 30          | 0.84 (0.72, 0.98) | 0.03    |
|                  |                      | MR Egger                  | 30          | 0.73 (0.38, 1.39) | 0.34    |
|                  |                      | Weighted median           | 30          | 0.85 (0.72, 1.01) | 0.06    |
|                  |                      | Simple mode               | 30          | 0.79 (0.54, 1.16) | 0.24    |
|                  |                      | Weighted mode             | 30          | 0.81 (0.61, 1.06) | 0.13    |
| Major depression | Rheumatoid arthritis | Inverse variance weighted | 53          | 1.12 (0.82, 1.53) | 0.48    |
|                  |                      | MR Egger                  | 53          | 0.53 (0.13, 2.14) | 0.38    |
|                  |                      | Weighted median           | 53          | 1.20 (0.81, 1.78) | 0.37    |

|         |                      |                           |    |                   |      |
|---------|----------------------|---------------------------|----|-------------------|------|
|         |                      | Simple mode               | 53 | 1.42 (0.56, 3.60) | 0.46 |
|         |                      | Weighted mode             | 53 | 0.75 (0.37, 1.53) | 0.43 |
| Anxiety | Rheumatoid arthritis | Inverse variance weighted | 6  | 1.10 (0.83, 1.45) | 0.52 |
|         |                      | MR Egger                  | 6  | 0.74 (0.14, 3.89) | 0.74 |
|         |                      | Weighted median           | 6  | 1.16 (0.83, 1.61) | 0.39 |
|         |                      | Simple mode               | 6  | 1.13 (0.65, 1.96) | 0.68 |
|         |                      | Weighted mode             | 6  | 1.18 (0.70, 2.00) | 0.56 |

---

**Table S5.** Potential confounding variables in SNPs associated with rheumatoid arthritis.

| Exposure             | Outcome          | SNP        | Potential confounding trait               | P-value   |
|----------------------|------------------|------------|-------------------------------------------|-----------|
| Rheumatoid arthritis | Bipolar disorder | rs12232497 | Crohns disease                            | 1.60e-09  |
|                      |                  | rs12539741 | Systemic lupus erythematosus              | 6.0e-31   |
|                      |                  | rs17264332 | Inflammatory bowel disease                | 4.79e-08  |
|                      |                  | rs3087243  | Diabetes                                  | 2.00e-17  |
| Rheumatoid arthritis | Broad depression | rs12232497 | Inflammatory bowel disease                | 1.02e-17  |
|                      |                  | rs12539741 | Systemic lupus erythematosus              | 6.0e-31   |
|                      |                  | rs17208363 | Self-reported hypothyroidism or myxoedema | 4.51e-11  |
|                      |                  | rs17264332 | Ulcerative colitis                        | 5.12e-11  |
|                      |                  | rs2229527  | Diabetes                                  | 2.71e-10  |
|                      |                  | rs2451258  | Psoriasis                                 | 3.40e-08  |
|                      |                  | rs2476601  | Self-reported hypothyroidism or myxoedema | 3.49e-124 |
|                      |                  | rs2561477  | Self-reported hypothyroidism or myxoedema | 3.29e-09  |
|                      |                  | rs2844456  | Self-reported hypothyroidism or myxoedema | 7.24e-42  |
|                      |                  | rs3087243  | Self-reported hypothyroidism or myxoedema | 8.63e-60  |
|                      |                  | rs3094633  | Diabetes                                  | 2.90e-08  |
|                      |                  | rs3129967  | Self-reported hypothyroidism or myxoedema | 6.13e-14  |

|                      |                  |            |                                           |           |
|----------------------|------------------|------------|-------------------------------------------|-----------|
|                      |                  | rs34046593 | Self-reported hypothyroidism or myxoedema | 3.64e-10  |
|                      |                  | rs34767257 | Diabetes                                  | 3.10e-15  |
|                      |                  | rs3749946  | Ulcerative colitis                        | 2.00e-15  |
|                      |                  | rs628357   | Diabetes                                  | 2.61e-15  |
|                      |                  | rs706778   | Self-reported hypothyroidism or myxoedema | 3.48e-13  |
|                      |                  | rs8032939  | Self-reported hypothyroidism or myxoedema | 2.23e-11  |
|                      |                  | rs8192585  | Diabetes                                  | 1.97e-13  |
|                      |                  | rs9277550  | Self-reported hypothyroidism or myxoedema | 1.45e-40  |
| Rheumatoid arthritis | Major depression | rs12232497 | Inflammatory bowel disease                | 1.87e-11  |
|                      |                  | rs13426947 | Self-reported hypothyroidism or myxoedema | 5.73e-18  |
|                      |                  | rs1571878  | Self-reported hypothyroidism or myxoedema | 1.25e-11  |
|                      |                  | rs17264332 | Ulcerative colitis                        | 5.12e-11  |
|                      |                  | rs2476601  | Self-reported hypothyroidism or myxoedema | 3.49e-124 |
|                      |                  | rs2561477  | Self-reported hypothyroidism or myxoedema | 3.29e-09  |
|                      |                  | rs3087243  | Self-reported hypothyroidism or myxoedema | 8.63e-60  |
|                      |                  | rs34046593 | Self-reported hypothyroidism or myxoedema | 3.64e-10  |

|                      |         |            |                                           |          |
|----------------------|---------|------------|-------------------------------------------|----------|
|                      |         | rs34536443 | Self-reported hypothyroidism or myxoedema | 6.69e-11 |
|                      |         | rs706778   | Self-reported hypothyroidism or myxoedema | 3.48e-13 |
|                      |         | rs8032939  | Self-reported hypothyroidism or myxoedema | 2.23e-11 |
| Rheumatoid arthritis | Anxiety | rs12232497 | Inflammatory bowel disease                | 1.02e-17 |
|                      |         | rs17264332 | Ulcerative colitis                        | 5.12e-11 |
|                      |         | rs2476601  | Diabetes                                  | 3.08e-08 |
|                      |         | rs3087243  | Diabetes                                  | 2.30e-17 |

---

**Table S6.** Estimates of causal effect of rheumatoid arthritis on depression, anxiety, and bipolar disorder after removal of SNPs associated with potential confounders.

| Exposure             | Outcome          | Method                    | No. of<br>SNPs | OR (95% CI)         | P-<br>value |
|----------------------|------------------|---------------------------|----------------|---------------------|-------------|
| Rheumatoid arthritis | Bipolar disorder | Inverse variance weighted | 39             | 0.98 (0.96, 1.01)   | 0.26        |
|                      |                  | MR Egger                  | 39             | 0.99 (0.95, 1.03)   | 0.61        |
|                      |                  | Weighted median           | 39             | 0.98 (0.96, 1.01)   | 0.14        |
|                      |                  | Simple mode               | 39             | 0.97 (0.91, 1.02)   | 0.24        |
|                      |                  | Weighted mode             | 39             | 0.98 (0.96, 1.01)   | 0.18        |
| Rheumatoid arthritis | Broad depression | Inverse variance weighted | 32             | 1.00 (0.994, 1.002) | 0.31        |
|                      |                  | MR Egger                  | 32             | 1.00 (0.993, 1.004) | 0.58        |
|                      |                  | Weighted median           | 32             | 1.00 (0.995, 1.004) | 0.77        |
|                      |                  | Simple mode               | 32             | 1.00 (0.989,1.006)  | 0.54        |
|                      |                  | Weighted mode             | 32             | 1.00 (0.994, 1.003) | 0.69        |

|                      |                  |                           |    |                   |      |
|----------------------|------------------|---------------------------|----|-------------------|------|
| Rheumatoid arthritis | Major depression | Inverse variance weighted | 22 | 0.99 (0.97, 1.02) | 0.66 |
|                      |                  | MR Egger                  | 22 | 1.01 (0.92, 1.11) | 0.83 |
|                      |                  | Weighted median           | 22 | 0.99 (0.97, 1.02) | 0.53 |
|                      |                  | Simple mode               | 22 | 0.98 (0.95, 1.02) | 0.43 |
|                      |                  | Weighted mode             | 22 | 0.99 (0.96, 1.02) | 0.54 |
| Rheumatoid arthritis | Anxiety          | Inverse variance weighted | 34 | 1.00 (0.98, 1.01) | 0.61 |
|                      |                  | MR Egger                  | 34 | 0.99 (0.91, 1.07) | 0.76 |
|                      |                  | Weighted median           | 34 | 0.99 (0.97, 1.01) | 0.37 |
|                      |                  | Simple mode               | 34 | 0.99 (0.96, 1.03) | 0.72 |
|                      |                  | Weighted mode             | 34 | 0.99 (0.96, 1.03) | 0.69 |

---

**Table S7.** Causal effect estimates from MR-PRESSO for the primary analysis.

| Exposure            | Outcome                 | Method                                        | No. of<br>SNPs | OR (95% CI)             | P-value |
|---------------------|-------------------------|-----------------------------------------------|----------------|-------------------------|---------|
| Bipolar<br>disorder | Rheumatoid<br>arthritis | MR-PRESSO (raw, 0<br>outliers)                | 33             | 0.82 (0.72, 0.95)       | 0.007   |
|                     |                         | MR-PRESSO (outliers<br>corrected, 1 outliers) | 32             | 0.83 (0.72, 0.96)       | 0.01    |
| Broad<br>depression | Rheumatoid<br>arthritis | MR-PRESSO (raw, 0<br>outliers)                | 2              | 11.76 (0.23,<br>600.62) | 0.22    |
|                     |                         | MR-PRESSO (outliers<br>corrected, 0 outliers) | 2              | 11.76 (0.23,<br>600.62) | 0.22    |
| Major<br>depression | Rheumatoid<br>arthritis | MR-PRESSO (raw, 0<br>outliers)                | 60             | 1.14 (0.87, 1.50)       | 0.35    |
|                     |                         | MR-PRESSO (outliers<br>corrected, 0 outliers) | 60             | 1.14 (0.87, 1.50)       | 0.35    |
| Anxiety             | Rheumatoid<br>arthritis | MR-PRESSO (raw, 0<br>outliers)                | 7              | 1.12 (0.89, 1.40)       | 0.35    |

|                         |                     |                                               |    |                        |      |
|-------------------------|---------------------|-----------------------------------------------|----|------------------------|------|
|                         |                     | MR-PRESSO (outliers<br>corrected, 0 outliers) | 7  | 1.12 (0.89, 1.40)      | 0.35 |
| Rheumatoid<br>arthritis | Bipolar<br>disorder | MR-PRESSO (raw, 0<br>outliers)                | 43 | 0.98 (0.95, 1.01)      | 0.21 |
|                         |                     | MR-PRESSO (outliers<br>corrected, 3 outliers) | 40 | 0.98 (0.96, 1.01)      | 0.26 |
| Rheumatoid<br>arthritis | Broad<br>depression | MR-PRESSO (raw, 0<br>outliers)                | 42 | 1.00 (0.996,<br>1.002) | 0.44 |
|                         |                     | MR-PRESSO (outliers<br>corrected, 2 outliers) | 40 | 1.00 (0.996,<br>1.002) | 0.40 |
| Rheumatoid<br>arthritis | Major<br>depression | MR-PRESSO (raw, 0<br>outliers)                | 33 | 1.00 (0.98, 1.02)      | 0.89 |
|                         |                     | MR-PRESSO (outliers<br>corrected, 0 outliers) | 33 | 1.00 (0.98, 1.02)      | 0.89 |
| Rheumatoid<br>arthritis | Anxiety             | MR-PRESSO (raw, 0<br>outliers)                | 38 | 0.99 (0.98, 1.01)      | 0.43 |

|                        |    |                   |      |
|------------------------|----|-------------------|------|
| MR-PRESSO (outliers    | 38 | 0.99 (0.98, 1.01) | 0.43 |
| corrected, 0 outliers) |    |                   |      |

---

The mr\_presso function was run with 10,000 iteration with outlier test set to true and a detection threshold of 0.05.

\

**Table S8.** Estimates of causal effect of anxiety on rheumatoid arthritis after removing rs6030245.

| exposure | outcome                 | method                       | No. of<br>SNPs | OR (95%<br>CI)       | P-<br>value | Heterogeneity |
|----------|-------------------------|------------------------------|----------------|----------------------|-------------|---------------|
| Anxiety  | Rheumatoid<br>arthritis | Inverse variance<br>weighted | 6              | 1.27 (1.03,<br>1.58) | 0.03        | 0.86          |
|          |                         | MR Egger                     | 6              | 1.08 (0.35,<br>3.39) | 0.90        | 0.76          |
|          |                         | Weighted<br>median           | 6              | 1.21 (0.92,<br>1.58) | 0.18        | NA            |
|          |                         | Simple mode                  | 6              | 1.16 (0.80,<br>1.66) | 0.47        | NA            |
|          |                         | Weighted mode                | 6              | 1.20 (0.86,<br>1.67) | 0.34        | NA            |

**Table S9.** Heterogeneity analysis between exposure factors and outcome variables

| Exposure             | Outcome              | Method                    | P-value  |
|----------------------|----------------------|---------------------------|----------|
| Bipolar disorder     | Rheumatoid arthritis | Inverse variance weighted | 0.002    |
| Broad depression     |                      | Inverse variance weighted | 1.88E-06 |
| Major depression     |                      | Inverse variance weighted | 0.008    |
| Anxiety              |                      | Inverse variance weighted | 0.19     |
| Rheumatoid arthritis | Bipolar disorder     | Inverse variance weighted | 2.87E-08 |
|                      | Broad depression     | Inverse variance weighted | 0.02     |
|                      | Major depression     | Inverse variance weighted | 9.06E-05 |
|                      | Anxiety              | Inverse variance weighted | 0.23     |

**Table S10.** Characteristics of the genetic variants that were used as the instrumental variables for bipolar disorder \*

| SNP         | Beta   | SE    | EAF   | Effect allele | Other allele | P-value     |
|-------------|--------|-------|-------|---------------|--------------|-------------|
| rs2126180   | 0.0564 | 0.009 | 0.457 | A             | G            | 1.6E-09     |
| rs10737496  | 0.0545 | 0.009 | 0.444 | C             | T            | 7.2E-09     |
| rs4619651   | 0.0658 | 0.010 | 0.670 | G             | A            | 4.8E-11     |
| rs17183814  | 0.1026 | 0.019 | 0.924 | G             | A            | 0.000000027 |
| rs13417268  | 0.0620 | 0.011 | 0.758 | C             | G            | 0.000000021 |
| rs2011302   | 0.0535 | 0.010 | 0.377 | A             | T            | 0.000000043 |
| rs2719164   | 0.0516 | 0.010 | 0.564 | A             | G            | 0.000000049 |
| rs9834970   | 0.0834 | 0.009 | 0.481 | C             | G            | 6.6E-19     |
| rs2336147   | 0.0677 | 0.009 | 0.498 | T             | C            | 3.6E-13     |
| rs115694474 | 0.0658 | 0.012 | 0.799 | T             | A            | 0.000000024 |
| rs696366    | 0.0516 | 0.009 | 0.550 | C             | A            | 0.000000045 |
| rs112481526 | 0.0630 | 0.011 | 0.256 | G             | A            | 1.9E-09     |
| rs28565152  | 0.0677 | 0.011 | 0.238 | A             | G            | 0.000000002 |
| rs6865469   | 0.0583 | 0.010 | 0.274 | T             | G            | 0.000000017 |
| rs6887473   | 0.0602 | 0.011 | 0.739 | G             | A            | 8.8E-09     |
| rs10043984  | 0.0602 | 0.011 | 0.236 | T             | C            | 0.000000037 |
| rs10866641  | 0.0630 | 0.009 | 0.575 | T             | C            | 2.8E-11     |
| rs13195402  | 0.1363 | 0.018 | 0.919 | G             | T            | 5.8E-15     |

|             |        |       |       |   |   |             |
|-------------|--------|-------|-------|---|---|-------------|
| rs1487445   | 0.0751 | 0.009 | 0.487 | T | C | 1.5E-15     |
| rs4331993   | 0.0545 | 0.010 | 0.382 | A | T | 0.00000002  |
| rs10455979  | 0.0554 | 0.010 | 0.500 | G | C | 4.2E-09     |
| rs12668848  | 0.0573 | 0.010 | 0.575 | G | A | 1.9E-09     |
| rs113779084 | 0.0760 | 0.010 | 0.299 | A | G | 1.4E-13     |
| rs6954854   | 0.0583 | 0.009 | 0.425 | G | A | 5.9E-10     |
| rs12672003  | 0.0917 | 0.016 | 0.113 | G | A | 2.7E-09     |
| rs11764361  | 0.0611 | 0.010 | 0.668 | A | G | 3.5E-09     |
| rs6946056   | 0.0535 | 0.010 | 0.623 | C | A | 0.000000037 |
| rs10255167  | 0.0658 | 0.012 | 0.778 | A | G | 0.000000016 |
| rs62489493  | 0.0898 | 0.014 | 0.128 | G | C | 2.6E-11     |
| rs3088186   | 0.0564 | 0.010 | 0.287 | T | C | 0.000000021 |
| rs2953928   | 0.1169 | 0.020 | 0.067 | A | G | 6.3E-09     |
| rs6992333   | 0.0602 | 0.010 | 0.410 | G | A | 1.6E-09     |
| rs10973201  | 0.0962 | 0.017 | 0.110 | C | T | 0.000000025 |
| rs62581014  | 0.0649 | 0.012 | 0.366 | T | C | 0.000000028 |
| rs1998820   | 0.0834 | 0.015 | 0.886 | T | A | 0.000000041 |
| rs10994415  | 0.1178 | 0.017 | 0.082 | C | T | 1.1E-11     |
| rs10761661  | 0.0516 | 0.009 | 0.472 | T | C | 0.000000047 |
| rs2273738   | 0.0917 | 0.014 | 0.135 | T | C | 1.6E-11     |

|            |        |       |       |   |   |             |
|------------|--------|-------|-------|---|---|-------------|
| rs174592   | 0.0714 | 0.010 | 0.395 | G | A | 9.9E-14     |
| rs4672     | 0.1017 | 0.017 | 0.083 | A | G | 3.4E-09     |
| rs475805   | 0.0677 | 0.011 | 0.767 | A | G | 0.000000002 |
| rs678397   | 0.0545 | 0.009 | 0.457 | T | C | 5.5E-09     |
| rs12575685 | 0.0649 | 0.010 | 0.327 | A | G | 1.2E-10     |
| rs12289486 | 0.0825 | 0.015 | 0.115 | T | C | 0.000000033 |
| rs11062170 | 0.0779 | 0.010 | 0.333 | C | G | 1.9E-15     |
| rs35306827 | 0.0658 | 0.011 | 0.775 | G | A | 3.6E-09     |
| rs2693698  | 0.0535 | 0.009 | 0.551 | G | A | 0.00000002  |
| rs35958438 | 0.0639 | 0.012 | 0.772 | G | A | 0.000000038 |
| rs4447398  | 0.0825 | 0.014 | 0.131 | A | C | 2.6E-09     |
| rs62011709 | 0.0620 | 0.011 | 0.747 | T | A | 0.000000014 |
| rs748455   | 0.0677 | 0.010 | 0.719 | T | C | 5E-11       |
| rs4702     | 0.0573 | 0.010 | 0.446 | G | A | 3.5E-09     |
| rs28455634 | 0.0630 | 0.010 | 0.620 | G | A | 2.6E-10     |
| rs7199910  | 0.0554 | 0.010 | 0.312 | G | T | 0.000000017 |
| rs12932628 | 0.0564 | 0.010 | 0.487 | T | G | 6.7E-09     |
| rs4790841  | 0.0723 | 0.013 | 0.151 | T | C | 0.000000031 |
| rs11870683 | 0.0573 | 0.01  | 0.650 | T | A | 0.000000028 |
| rs61554907 | 0.0871 | 0.015 | 0.124 | T | G | 0.000000016 |

|            |        |       |       |   |   |             |
|------------|--------|-------|-------|---|---|-------------|
| rs228768   | 0.0649 | 0.01  | 0.294 | G | T | 2.8E-10     |
| rs67712855 | 0.0677 | 0.01  | 0.687 | T | G | 4.2E-11     |
| rs6032110  | 0.0573 | 0.009 | 0.512 | A | G | 0.000000001 |
| rs237460   | 0.0554 | 0.009 | 0.412 | T | C | 4.3E-09     |
| rs13044225 | 0.0545 | 0.01  | 0.440 | G | A | 8.5E-09     |
| rs5758064  | 0.0526 | 0.009 | 0.523 | T | C | 0.00000002  |

SNP, single nucleotide polymorphism; SE, standard error; EAF, effect allele frequency; Beta coefficients are in standard deviation (SD) unit per allele; effect allele is the bipolar disorder-raising allele.

\*Source: Mullins, N et al, 2021 [1]

**Table S11.** Characteristics of the genetic variants that were used as the instrumental variables for broad depression\*

| SNP        | Beta    | SE     | EAF    | Effect allele | Other allele | P-value  |
|------------|---------|--------|--------|---------------|--------------|----------|
| rs3807865  | 0.0082  | 0.0012 | 0.4117 | A             | G            | 7.28E-12 |
| rs10501696 | -0.0070 | 0.0012 | 0.4987 | G             | A            | 6.73E-11 |

SNP, single nucleotide polymorphism; SE, standard error; EAF, effect allele frequency; Beta coefficients are in standard deviation (SD) unit per allele; effect allele is the broad depression-raising allele.

\*Source: Howard, D.M et al, 2018 [2]

**Table S12.** Characteristics of the genetic variants that were used as the instrumental variables for major depression\*

| SNP         | Beta    | SE     | EAF    | Effect allele | Other allele | P-value  |
|-------------|---------|--------|--------|---------------|--------------|----------|
| rs301799    | -0.0254 | 0.0022 | 0.5694 | T             | C            | 4.05E-31 |
| rs1002656   | -0.0210 | 0.0024 | 0.7033 | T             | C            | 4.84E-19 |
| rs1466887   | -0.0125 | 0.0022 | 0.5511 | T             | C            | 1.37E-08 |
| rs11579246  | 0.0320  | 0.0037 | 0.9067 | A             | G            | 8.07E-18 |
| rs1890946   | -0.0194 | 0.0022 | 0.4671 | T             | C            | 8.62E-19 |
| rs10789214  | 0.0137  | 0.0022 | 0.5661 | T             | C            | 3.81E-10 |
| rs2568958   | 0.0336  | 0.0022 | 0.6156 | A             | G            | 4.45E-52 |
| rs10890020  | -0.0267 | 0.0022 | 0.5156 | A             | G            | 3.31E-34 |
| rs113188507 | 0.0234  | 0.0025 | 0.2838 | A             | G            | 2.94E-21 |
| rs10913112  | -0.0214 | 0.0023 | 0.3767 | T             | C            | 1.72E-20 |
| rs72710803  | -0.0247 | 0.0038 | 0.9121 | A             | C            | 1.35E-10 |
| rs169235    | -0.0170 | 0.0025 | 0.7530 | A             | G            | 1.61E-11 |
| rs17641524  | -0.0243 | 0.0027 | 0.2091 | T             | C            | 7.9E-20  |
| rs12052908  | -0.0211 | 0.0022 | 0.5325 | A             | T            | 3.98E-22 |
| rs1568452   | 0.0293  | 0.0022 | 0.3851 | T             | C            | 3.08E-40 |
| rs7585722   | -0.0215 | 0.0030 | 0.8458 | T             | C            | 5.47E-13 |
| rs1226412   | 0.0232  | 0.0027 | 0.7917 | T             | C            | 3.35E-18 |
| rs62188629  | 0.0169  | 0.0024 | 0.3136 | A             | G            | 6.15E-13 |

|             |         |        |        |   |   |          |
|-------------|---------|--------|--------|---|---|----------|
| rs4346585   | -0.0163 | 0.0024 | 0.6960 | T | C | 4.87E-12 |
| rs13084037  | -0.0217 | 0.0025 | 0.7740 | A | G | 1.79E-17 |
| rs7624336   | 0.0092  | 0.0027 | 0.2087 | T | G | 0.000548 |
| rs141954845 | 0.0179  | 0.0022 | 0.3880 | A | G | 1.18E-15 |
| rs6783233   | 0.0177  | 0.0024 | 0.2833 | T | C | 1.14E-13 |
| rs1095626   | -0.0285 | 0.0022 | 0.5799 | T | C | 6.31E-39 |
| rs7685686   | 0.0173  | 0.0022 | 0.5753 | A | G | 5.52E-15 |
| rs34937911  | 0.0244  | 0.0034 | 0.8838 | T | C | 5.39E-13 |
| rs45510091  | 0.0463  | 0.0049 | 0.9472 | A | G | 7.74E-21 |
| rs35553410  | -0.0159 | 0.0025 | 0.7462 | T | C | 2.18E-10 |
| rs7659414   | -0.0089 | 0.0022 | 0.5782 | A | C | 4.32E-05 |
| rs60157091  | 0.0205  | 0.0022 | 0.515  | T | C | 5.54E-21 |
| rs3099439   | -0.0208 | 0.0022 | 0.5288 | T | C | 1.61E-21 |
| rs10061069  | -0.0250 | 0.0026 | 0.2212 | C | G | 5.17E-22 |
| rs30266     | 0.0323  | 0.0023 | 0.3296 | A | G | 1.99E-45 |
| rs11135349  | -0.025  | 0.0022 | 0.4713 | A | C | 2.18E-30 |
| rs200949    | 0.0433  | 0.0034 | 0.8744 | A | G | 2.13E-37 |
| rs9363467   | 0.0158  | 0.0023 | 0.6035 | T | C | 2.5E-12  |
| rs7758630   | -0.0165 | 0.0022 | 0.4051 | A | T | 7.79E-14 |
| rs1933802   | -0.0198 | 0.0022 | 0.4536 | C | G | 1.36E-19 |

|            |         |        |        |   |   |          |
|------------|---------|--------|--------|---|---|----------|
| rs2876520  | -0.0187 | 0.0022 | 0.5271 | C | G | 2.65E-17 |
| rs725616   | 0.0135  | 0.0022 | 0.3644 | T | C | 1.06E-09 |
| rs2029865  | -0.0184 | 0.0022 | 0.4534 | A | T | 4.02E-17 |
| rs3823624  | 0.0294  | 0.0028 | 0.8067 | T | C | 1.61E-26 |
| rs2043539  | 0.0220  | 0.0022 | 0.4177 | A | G | 8.32E-24 |
| rs2247523  | -0.0159 | 0.0021 | 0.5319 | C | G | 9.05E-14 |
| rs16887442 | 0.0148  | 0.0022 | 0.4347 | T | C | 1.25E-11 |
| rs58104186 | 0.0190  | 0.0022 | 0.4689 | A | G | 3.56E-18 |
| rs7807677  | 0.0211  | 0.0022 | 0.5505 | T | C | 5.4E-22  |
| rs7837935  | -0.0226 | 0.0031 | 0.1522 | T | G | 1.15E-13 |
| rs67436663 | -0.0141 | 0.0025 | 0.2402 | C | G | 2.83E-08 |
| rs1354115  | 0.0186  | 0.0022 | 0.6243 | A | C | 4.39E-17 |
| rs1982277  | 0.0206  | 0.0026 | 0.7594 | T | C | 1.28E-15 |
| rs263645   | 0.0176  | 0.0022 | 0.5438 | A | T | 6.92E-16 |
| rs3793577  | -0.0211 | 0.0022 | 0.4665 | A | G | 5.58E-22 |
| rs59283172 | -0.0174 | 0.0036 | 0.1069 | A | G | 1.18E-06 |
| rs34653192 | -0.0196 | 0.0024 | 0.3196 | C | G | 3.39E-16 |
| rs7030813  | 0.0251  | 0.0022 | 0.3736 | T | C | 8.88E-30 |
| rs10817969 | 0.0169  | 0.0024 | 0.7173 | T | G | 1.32E-12 |
| rs913930   | -0.0219 | 0.0023 | 0.6433 | A | G | 1.03E-21 |

|            |         |        |        |   |   |          |
|------------|---------|--------|--------|---|---|----------|
| rs2670139  | -0.0177 | 0.0025 | 0.7609 | T | C | 2.19E-12 |
| rs997934   | 0.0163  | 0.0023 | 0.3795 | T | C | 4.6E-13  |
| rs1021363  | 0.0226  | 0.0023 | 0.3547 | A | G | 3.77E-23 |
| rs1448938  | 0.0172  | 0.0022 | 0.4171 | A | G | 3.74E-15 |
| rs2509805  | 0.0191  | 0.0024 | 0.3209 | T | C | 4.92E-16 |
| rs198457   | -0.0213 | 0.0028 | 0.1925 | T | C | 5.41E-14 |
| rs58621819 | -0.0169 | 0.0027 | 0.7903 | A | T | 2.17E-10 |
| rs7117514  | -0.0166 | 0.0022 | 0.5417 | A | G | 3.64E-14 |
| rs7932640  | 0.0227  | 0.0022 | 0.4417 | T | C | 3.4E-25  |
| rs61902811 | -0.0289 | 0.0022 | 0.3682 | A | G | 5.17E-39 |
| rs2187490  | -0.0152 | 0.0039 | 0.9106 | T | G | 8.49E-05 |
| rs57344483 | -0.0241 | 0.0041 | 0.9259 | A | G | 5.26E-09 |
| rs78337797 | 0.0229  | 0.0034 | 0.8781 | T | G | 1.37E-11 |
| rs56314503 | -0.0203 | 0.0025 | 0.7487 | T | G | 1.28E-16 |
| rs10774600 | -0.0133 | 0.0030 | 0.1656 | T | C | 1.07E-05 |
| rs3213572  | 0.0196  | 0.0021 | 0.4745 | A | G | 5.51E-20 |
| rs1409379  | 0.0164  | 0.0025 | 0.7641 | T | C | 8.26E-11 |
| rs1343605  | 0.0231  | 0.0022 | 0.3840 | A | C | 1.62E-25 |
| rs9592461  | 0.0243  | 0.0022 | 0.4874 | A | G | 1.17E-28 |
| rs9545360  | -0.0167 | 0.0029 | 0.1807 | A | C | 6.7E-09  |

|            |         |        |        |   |   |          |
|------------|---------|--------|--------|---|---|----------|
| rs4772087  | 0.0209  | 0.0023 | 0.3732 | T | C | 2.34E-20 |
| rs61990288 | -0.0249 | 0.0021 | 0.5083 | A | G | 1.96E-31 |
| rs1956373  | -0.0169 | 0.0025 | 0.7436 | T | G | 6.08E-12 |
| rs1152578  | -0.0152 | 0.0022 | 0.4357 | T | C | 4.19E-12 |
| rs1045430  | -0.0226 | 0.0022 | 0.4792 | T | G | 4.44E-25 |
| rs10149470 | -0.0206 | 0.0021 | 0.4869 | A | G | 6.88E-22 |
| rs8037355  | -0.0192 | 0.0022 | 0.5556 | T | C | 1.52E-18 |
| rs34488670 | -0.0193 | 0.0027 | 0.7887 | T | C | 4.69E-13 |
| rs7193263  | -0.0206 | 0.0023 | 0.6679 | A | G | 3.83E-19 |
| rs7198928  | 0.0219  | 0.0022 | 0.6159 | T | C | 3.71E-23 |
| rs7200826  | 0.027   | 0.0025 | 0.2551 | T | C | 3.09E-28 |
| rs56887639 | -0.0171 | 0.0024 | 0.7264 | A | G | 6.04E-13 |
| rs12923444 | -0.0237 | 0.0023 | 0.5625 | A | C | 1.76E-24 |
| rs75581564 | 0.0248  | 0.0034 | 0.1165 | A | G | 3.49E-13 |
| rs12967855 | 0.0207  | 0.0023 | 0.3295 | A | G | 1.32E-19 |
| rs7227069  | 0.0242  | 0.0022 | 0.4326 | A | G | 2.13E-28 |
| rs62091461 | -0.0199 | 0.0026 | 0.2274 | T | C | 1.75E-14 |
| rs12966052 | -0.0187 | 0.0028 | 0.1805 | C | G | 3.76E-11 |
| rs12967143 | -0.0256 | 0.0024 | 0.6984 | C | G | 1.61E-27 |
| rs7241572  | 0.02    | 0.0027 | 0.2010 | A | G | 2.56E-13 |

|             |         |        |        |   |   |          |
|-------------|---------|--------|--------|---|---|----------|
| rs33431     | 0.0121  | 0.0022 | 0.6144 | T | C | 4.69E-08 |
| rs143186028 | 0.0244  | 0.0028 | 0.1778 | T | G | 7.23E-18 |
| rs12624433  | 0.0191  | 0.0025 | 0.2584 | A | G | 2.16E-14 |
| rs5995992   | -0.0301 | 0.0024 | 0.7155 | T | C | 2.6E-35  |

SNP, single nucleotide polymorphism; SE, standard error; EAF, effect allele frequency; Beta coefficients are in standard deviation (SD) unit per allele; effect allele is the major depression-raising allele.

\*Source: Howard, D.M, et al, 2019 [3]

**Table S13.** Characteristics of the genetic variants that were used as the instrumental variables for anxiety\*

| SNP         | Beta    | SE     | EAF   | Effect allele | Other allele | P-value  |
|-------------|---------|--------|-------|---------------|--------------|----------|
| rs7528604   | -0.1165 | 0.0174 | 0.385 | A             | G            | 5.39E-11 |
| rs1458103   | -0.1076 | 0.0194 | 0.741 | A             | C            | 6.19E-08 |
| rs113209956 | -0.1887 | 0.0353 | 0.085 | T             | C            | 6.36E-08 |
| rs6462203   | -0.1043 | 0.0194 | 0.265 | A             | C            | 1.09E-07 |
| rs6030245   | 0.1133  | 0.0222 | 0.795 | T             | C            | 5.06E-07 |
| rs11855560  | 0.0853  | 0.0172 | 0.469 | T             | C            | 6.96E-07 |
| rs2451828   | 0.2927  | 0.0592 | 0.019 | T             | C            | 7.37E-07 |
| rs16916239  | -0.1020 | 0.0211 | 0.783 | A             | G            | 8.96E-07 |
| rs79928194  | -0.1485 | 0.0305 | 0.905 | T             | C            | 1.26E-06 |
| rs342422    | -0.0834 | 0.0224 | 0.530 | A             | G            | 1.28E-06 |

SNP, single nucleotide polymorphism; SE, standard error; EAF, effect allele frequency; Beta coefficients are in standard deviation (SD) unit per allele; effect allele is the anxiety -raising allele.

\*Source: Otowa, T et al, 2016 [4]

**Table S14.** Characteristics of the genetic variants that were used as the instrumental variables for rheumatoid arthritis\*

| SNP        | Beta     | SE       | EAF    | Effect allele | Other allele | P-value   |
|------------|----------|----------|--------|---------------|--------------|-----------|
| rs61828284 | -0.19845 | 0.034487 | 0.9205 | T             | C            | 8.70E-09  |
| rs28411352 | 0.10436  | 0.017868 | 0.7495 | T             | C            | 5.20E-09  |
| rs2476601  | -0.59333 | 0.022782 | 0.0944 | G             | A            | 1.60E-149 |
| rs2240336  | -0.10536 | 0.017399 | 0.4145 | T             | C            | 1.40E-09  |
| rs60733400 | -0.10536 | 0.017365 | 0.3141 | A             | G            | 1.30E-09  |
| rs9261602  | 0.18633  | 0.021503 | 0.5477 | G             | A            | 4.50E-18  |
| rs13426947 | 0.131028 | 0.018694 | 0.1909 | A             | G            | 2.40E-12  |
| rs3087243  | -0.13926 | 0.015307 | 0.4702 | A             | G            | 9.20E-20  |
| rs34695944 | 0.116534 | 0.015438 | 0.3608 | C             | T            | 4.40E-14  |
| rs2661798  | 0.094311 | 0.015476 | 0.5517 | T             | A            | 1.10E-09  |
| rs9653442  | -0.10536 | 0.015155 | 0.4533 | T             | C            | 3.60E-12  |
| rs4452313  | 0.105361 | 0.016684 | 0.6918 | T             | A            | 2.70E-10  |
| rs9310852  | 0.083382 | 0.015078 | 0.5378 | G             | A            | 3.20E-08  |
| rs73081554 | 0.165514 | 0.030301 | 0.9483 | T             | C            | 4.70E-08  |
| rs34046593 | 0.139762 | 0.016809 | 0.3211 | A             | G            | 9.20E-17  |
| rs2561477  | -0.10536 | 0.016958 | 0.3022 | A             | G            | 5.20E-10  |

|            |          |          |        |   |   |           |
|------------|----------|----------|--------|---|---|-----------|
| rs7731626  | -0.19845 | 0.020177 | 0.3777 | A | G | 7.90E-23  |
| rs212389   | 0.09531  | 0.01564  | 0.3738 | A | G | 1.10E-09  |
| rs9258570  | -0.14842 | 0.020383 | 0.1988 | C | G | 3.30E-13  |
| rs17264332 | 0.162519 | 0.018316 | 0.831  | G | A | 7.10E-19  |
| rs9275183  | 0.776529 | 0.022961 | 0.836  | G | A | 1.00E-200 |
| rs13196363 | -0.27444 | 0.026895 | 0.8121 | T | C | 1.90E-24  |
| rs2844456  | 0.891598 | 0.029191 | 0.9602 | C | T | 1.00E-200 |
| rs1042153  | -0.37106 | 0.020927 | 0.2296 | A | G | 2.40E-70  |
| rs34431565 | -0.44629 | 0.043257 | 0.0368 | T | G | 5.90E-25  |
| rs1571878  | -0.11653 | 0.014884 | 0.4215 | T | C | 4.90E-15  |
| rs9368695  | -0.35668 | 0.063123 | 0.9881 | T | C | 1.60E-08  |
| rs2233434  | 0.287682 | 0.052072 | 0.0497 | G | A | 3.30E-08  |
| rs12539741 | 0.157004 | 0.023156 | 0.8996 | T | C | 1.20E-11  |
| rs11574914 | 0.122218 | 0.016545 | 0.6849 | A | G | 1.50E-13  |
| rs10985070 | -0.08338 | 0.014784 | 0.5656 | A | C | 1.70E-08  |
| rs12764378 | 0.131028 | 0.017813 | 0.2445 | A | G | 1.90E-13  |
| rs537544   | -0.11653 | 0.017927 | 0.6203 | T | C | 8.00E-11  |
| rs706778   | 0.10436  | 0.015223 | 0.4135 | T | C | 7.10E-12  |
| rs10790268 | 0.162519 | 0.020627 | 0.1889 | G | A | 3.30E-15  |
| rs9603608  | -0.10436 | 0.016035 | 0.6561 | C | A | 7.60E-11  |

|            |          |          |        |   |   |          |
|------------|----------|----------|--------|---|---|----------|
| rs8032939  | 0.116534 | 0.016626 | 0.2416 | C | T | 2.40E-12 |
| rs8026898  | 0.14842  | 0.017518 | 0.2853 | A | G | 2.40E-17 |
| rs13330176 | 0.113329 | 0.019714 | 0.2396 | A | T | 9.00E-09 |
| rs12232497 | 0.094311 | 0.015981 | 0.4722 | C | T | 3.60E-09 |
| rs592390   | -0.09531 | 0.016174 | 0.5229 | C | T | 3.80E-09 |
| rs34536443 | -0.37844 | 0.046596 | 0.0288 | C | G | 4.60E-16 |
| rs4239702  | 0.139262 | 0.018434 | 0.7127 | C | T | 4.20E-14 |
| rs8133843  | 0.09531  | 0.016385 | 0.6252 | A | G | 6.00E-09 |
| rs225433   | -0.12783 | 0.022705 | 0.8111 | G | C | 1.80E-08 |
| rs2069235  | 0.10436  | 0.016568 | 0.2992 | A | G | 3.00E-10 |

---

SNP, single nucleotide polymorphism; SE, standard error; EAF, effect allele frequency; Beta coefficients are in standard deviation (SD) unit per allele; effect allele is rheumatoid arthritis -raising allele.

\*Source: Okada, Y et al, 2014 [5]

## Reference:

1. Mullins, N.; Forstner, A.J.; O'Connell, K.S.; Coombes, B.; Coleman JR, I.; Qiao, Z.; Als, T.D.; Bigdeli, T.B.; Børte, S.; Bryois, J.; et al. Genome-wide association study of more than 40,000 bipolar disorder cases provides new insights into the underlying biology. *Nat. Genet.* 2021, 53, 817–829.
2. Howard, D.M.; Adams, M.J.; Shirali, M.; Clarke, T.K.; Marioni, R.E.; Davies, G.; Coleman JR, I.; Alloza, C.; Shen, X.; Barbu, M.C.; et al. Genome-wide association study of depression phenotypes in uk biobank identifies variants in excitatory synaptic pathways. *Nat. Commun.* 2018, 9, 1470.
3. Howard, D.M.; Adams, M.J.; Clarke, T.K.; Hafferty, J.D.; Gibson, J.; Shirali, M.; Coleman JR, I.; Hagenaars, S.P.; Ward, J.; Wigmore, E.M.; et al. Genome-wide meta-analysis of depression identifies 102 independent variants and highlights the importance of the prefrontal brain regions. *Nat. Neurosci.* 2019, 22, 343–352.

4. Otowa, T.; Hek, K.; Lee, M.; Byrne, E.M.; Mirza, S.S.; Nivard, M.G.; Bigdeli, T.; Aggen, S.H.; Adkins, D.; Wolen, A.; et al. Meta-analysis of genome-wide association studies of anxiety disorders. *Mol. Psychiatry* 2016, 21, 1391–1399.
5. Okada, Y.; Wu, D.; Trynka, G.; Raj, T.; Terao, C.; Ikari, K.; Kochi, Y.; Ohmura, K.; Suzuki, A.; Yoshida, S.; et al. Genetics of rheumatoid arthritis contributes to biology and drug discovery. *Nature* 2014, 506, 376–381.

## 2 Supplementary Figures

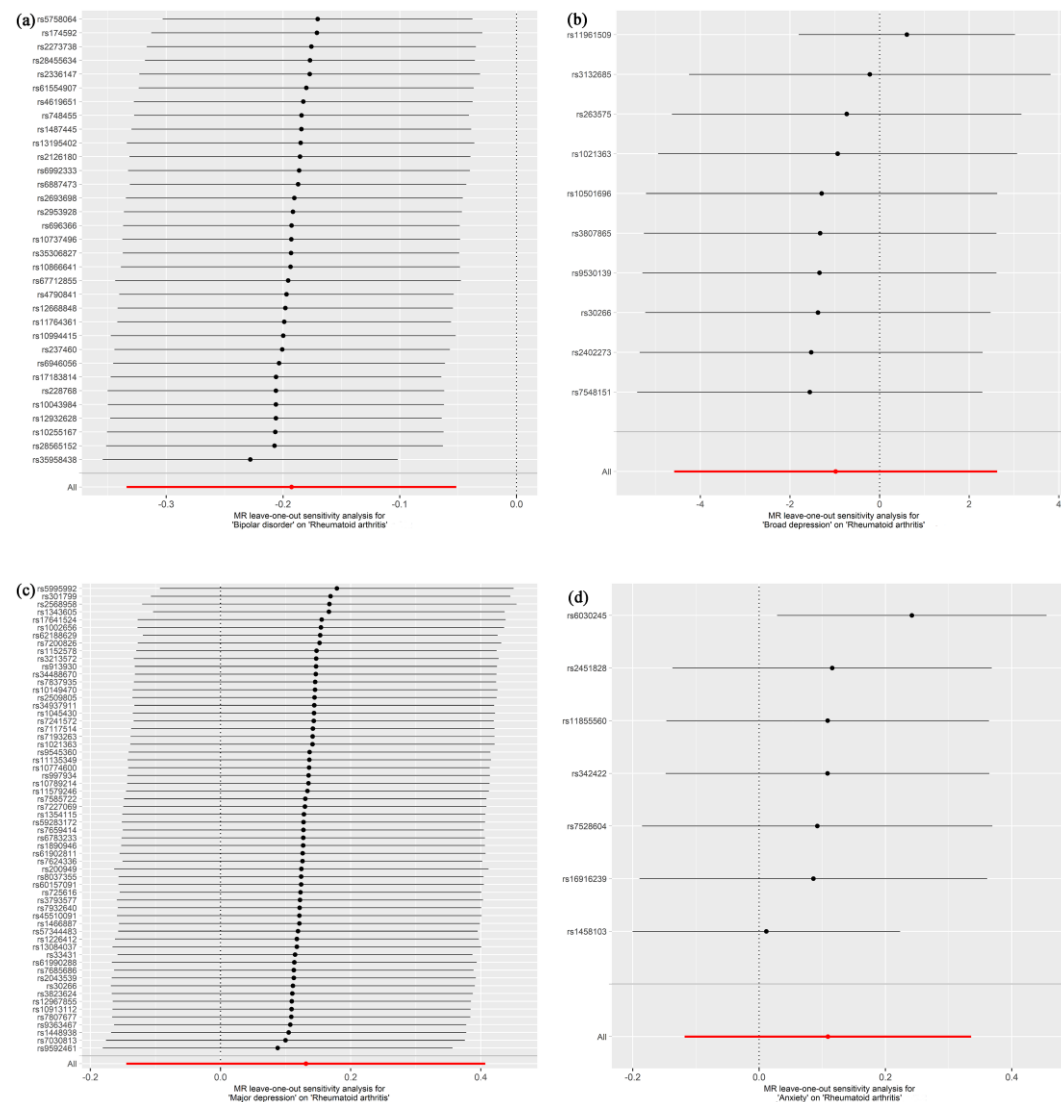

**Figure S1.** Leave-one-out analysis of associations of genetic risk on mental illness on the risk of rheumatoid arthritis. (a) Bipolar disorder; (b) Broad depression; (c) Major depression; (d) Anxiety.

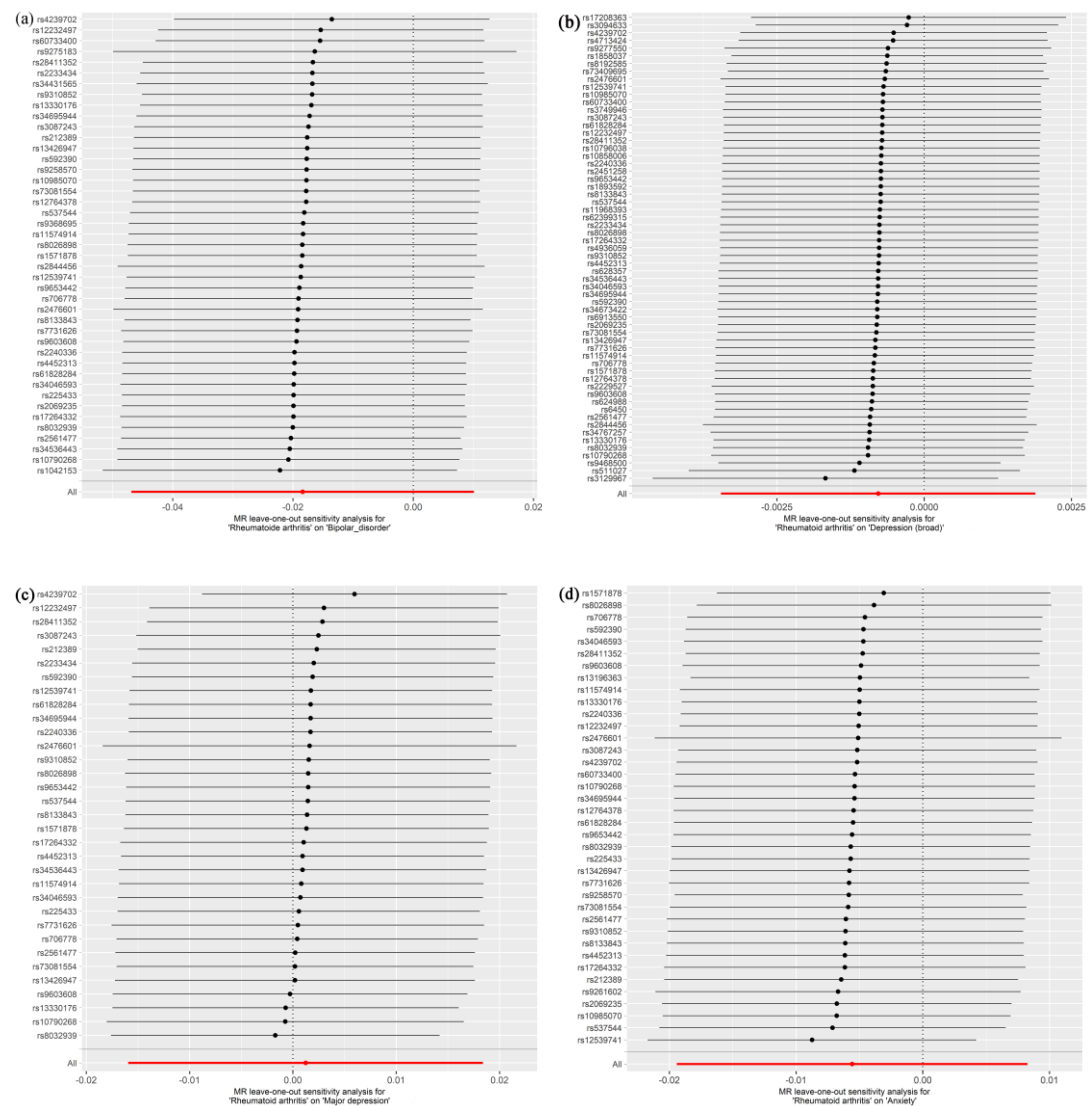

**Figure S2.** Leave-one-out analysis of associations of genetic risk on rheumatoid arthritis on the risk of mental illness. (a) Bipolar disorder; (b) Broad depression; (c) Major depression; (d) Anxiety.
